# Supplementary material for: Effect of Aqueous Extract of Adansonia digitata Stem Bark on the Development of Hypertension in L-NAME-Induced Hypertensive Rat Model
Source: Evid Based Complement Alternat Med. 2020 Sep 18;2020:3678469. doi: 10.1155/2020/3678469 (PMC7519996; doi:10.1155/2020/3678469)
Supplement: Supplementary Materials — The supplementary file includes the raw data of the article. [file 3678469.f1.xlsx]

## Sheet: PRESSION ARTERIELLE
				PAS				PAS				PAD				PAS				PAM				PAS				FC				PAS
	Temps (min)	1	2	3	4	5	Moyenne	EC	ESM *	1	2	3	4	5	Moyenne	EC	ESM *	1	2	3	4	5	Moyenne	EC	ESM *	1	2	3	4	5	Moyenne	EC	ESM *
	5	107.655	115.851	134.778	107.719	117.4	116.681	9.90439	3.74351	77.0142	78.3081	104.492	77.0142	77.0142	82.7686	10.8734	4.10975	87.2278	90.8225	114.587	87.2491	90.4763	94.0726	10.3708	3.91978	377.373	410.576	384.904	391.618	395.699	392.034	11.1642	4.21966
NaCl 0,9 %	10	106.756	112.739	126.831	104.887	114.235	113.09	7.71563	2.91624	74.5605	79.6753	98.9829	80.6813	74.5605	81.6921	9.00866	3.40495	85.2925	90.6966	108.266	88.7498	87.7853	92.158	8.23969	3.11431	360.583	407.761	379.197	382.514	389.824	383.976	15.3112	5.78709
	15	106.31	111.515	124.89	104.683	112.816	112.043	7.11276	2.68837	76.0742	79.895	96.4092	80.4216	76.0742	81.7749	7.54351	2.85118	86.1528	90.4349	105.903	88.5089	88.3215	91.8642	7.1492	2.70214	361.58	403.579	373.582	379.247	385.136	380.625	13.8668	5.24116
	20	109.654	112.489	125.952	105.769	113.197	113.412	6.79255	2.56734	80.4199	76.0498	98.7915	74.5605	77.3167	81.4277	8.89379	3.36154	90.1647	88.1961	107.845	84.9633	89.2768	92.0892	8.07211	3.05097	378.761	404.166	372.88	384.602	386.216	385.325	10.5288	3.97951
	25	107.589	108.787	122.107	104.214	112.086	110.957	6.11744	2.31217	81.6681	74.6582	93.2739	76.0742	76.6681	80.4685	6.82539	2.57976	90.3083	86.0343	102.885	85.4543	88.4741	90.6312	6.36935	2.40739	378.761	404.298	372.873	386.644	387.938	386.103	10.6172	4.01293
	Temps (min)	1	2	3	4	5	Moyenne	EC	ESM *	1	2	3	4	5	Moyenne	EC	ESM *	1	2	3	4	5	Moyenne	EC	ESM *	1	2	3	4	5	Moyenne	EC	ESM *
	5	197.298	196.35	170.868	196.756	188.182	189.891	10.0847	3.81167	159.643	159.658	132.269	158.649	128.15	147.674	14.3235	5.41379	172.195	171.888	145.135	171.351	148.161	161.746	12.3676	4.6745	425.296	443.058	366.727	324.259	388.871	389.642	42.2495	15.9688
	10	196.404	195.63	171.209	194.96	186.459	188.933	9.56289	3.61443	158.743	160.51	131.992	157.225	125.305	146.755	14.9706	5.65834	171.297	172.217	145.064	169.804	145.69	160.814	12.6295	4.7735	431.885	442.619	361.987	324.289	387.097	389.575	43.8938	16.5903
L-NAME + ED	15	197.675	196.558	171.733	197.606	186.481	190.011	10.0581	3.80162	157.749	160.534	134.396	158.665	127.392	147.747	13.9666	5.27888	171.058	172.542	146.841	171.645	147.088	161.835	12.1508	4.59256	430.886	446.885	367.097	318.191	384.775	389.567	46.0762	17.4152
	20	197.347	196.502	169.52	196.475	186.015	189.172	10.6776	4.03574	159.354	161.23	132.752	156.358	127.24	147.387	14.3903	5.43904	172.018	172.987	145.008	169.73	146.831	161.315	12.6278	4.77287	428.266	447.176	363.782	327.88	384.91	390.403	43.1389	16.305
	25	197.767	196.293	170.152	196.696	186.291	189.44	10.4966	3.96735	158.317	158.516	134.413	156.432	126.007	146.737	13.7727	5.20558	171.467	171.108	146.326	169.853	146.102	160.971	12.0614	4.55877	426.309	446.481	372.23	326.427	382.653	390.82	42.2288	15.961
	Temps (min)	1	2	3	4	5	Moyenne	EC	ESM *	1	2	3	4	5	Moyenne	EC	ESM *	1	2	3	4	5	Moyenne	EC	ESM *	1	2	3	4	5	Moyenne	EC	ESM *
	5	146.79	169.25	126.964	132.871	160.936	147.362	16.0607	6.07039	129.224	130.432	102.124	111.328	120.593	118.74	10.7803	4.07457	135.079	143.372	110.404	118.509	134.041	128.281	12.0182	4.54245	392.416	319.214	359.146	369.269	356.654	359.34	23.7064	8.96019
	10	145.227	168.176	129.651	134.123	161.854	147.806	15.0719	5.69663	127.991	129.126	107.739	107.959	122.705	119.104	9.44193	3.56871	133.736	142.143	115.043	116.68	135.755	128.671	10.8335	4.09468	386.041	317.268	352.941	366.173	354.074	355.299	22.4354	8.4798
L-NAME+Capto.	15	146.606	166.772	130.679	129.468	161.731	147.051	15.3743	5.81093	128.992	129.089	110.754	100.305	129.614	119.751	12.0744	4.5637	134.863	141.65	117.396	110.026	140.32	128.851	12.7836	4.83175	382.724	319.324	343.475	361.725	350.218	351.493	20.8843	7.89352
	20	142.212	169.202	132.596	128.942	158.789	146.348	15.4031	5.82182	125.745	130.42	111.438	77.1729	130.408	115.037	20.1702	7.62363	131.234	143.347	118.491	94.4292	139.868	125.474	17.7334	6.70259	378.35	318.401	335.471	350.58	323.668	341.294	21.5782	8.15578
	25	146.265	166.699	132.354	129.468	161.977	147.352	15.0611	5.69258	128.735	128.528	111.67	99.4385	134.692	120.613	13.0781	4.94306	134.578	141.252	118.564	109.448	143.787	129.526	13.3392	5.04175	375.88	317.755	324.402	352.636	341.628	342.46	20.7728	7.85137
	Temps (min)	1	2	3	4	5	Moyenne	EC	ESM *	1	2	3	4	5	Moyenne	EC	ESM *	1	2	3	4	5	Moyenne	EC	ESM *	1	2	3	4	5	Moyenne	EC	ESM *
	5	174.268	180.128	169.042	168.091	169.199	172.145	4.53807	1.71523	137.228	141.443	134.705	130.288	131.705	135.073	3.98978	1.508	149.574	154.338	146.15	142.889	144.203	147.431	4.12277	1.55826	354.032522	336.443	308.347	403.749	365.331	353.467	35.3365	13.3559
	10	177.566	179.386	169.523	170.996	170.842	173.663	4.00494	1.51373	138.904	140.527	133.337	133.83	133.337	135.987	3.09242	1.16882	151.791	153.48	145.399	146.218	145.839	148.546	3.39189	1.28201	356.901202	327.424	309.389	403.021	362.573	350.602	35.8009	13.5315
L-NAME+AD. 100	15	177.215	181.377	171.292	169.693	169.493	173.814	4.70699	1.77907	138.572	142.01	136.822	132.401	132.819	136.525	3.60852	1.36389	151.453	155.132	148.312	144.832	145.043	148.954	3.92721	1.48435	358.086092	328.973	310.154	402.35	358.117	349.899	34.7714	13.1424
	20	176.458	178.282	171.386	168.43	168.574	172.626	4.05585	1.53297	137.915	142.36	135.608	131.49	129.308	135.336	4.63025	1.75007	150.763	154.334	147.534	143.803	142.397	147.766	4.39802	1.66229	353.970160	325.296	308.659	402.602	353.97	347.632	35.636	13.4691
	25	176.019	172.52	173.264	164.495	168.367	170.933	4.04585	1.52919	139.819	142.462	134.942	131.781	130.698	135.94	4.54667	1.71848	151.886	152.481	147.716	142.686	143.254	147.604	4.12907	1.56064	351.941593	327.169	308.637	395.484	351.942	345.808	32.5362	12.2975
	Temps (min)	1	2	3	4	5	Moyenne	EC	ESM *	1	2	3	4	5	Moyenne	EC	ESM *	1	2	3	4	5	Moyenne	EC	ESM *	1	2	3	4	5	Moyenne	EC	ESM *
	5	110.428	152.798	159.25	152.698	170.343	149.104	20.3786	7.70239	85.3399	112.917	123.676	116.853	140.418	115.841	17.9183	6.77247	93.7027	126.211	135.534	128.801	150.393	126.928	18.6152	7.0359	254.316	376.486	370.826	396.727	329.639	345.599	50.58	19.1175
	10	110.125	152.7	154.404	148.962	171.001	147.439	20.1295	7.60823	83.7276	112.659	121.553	116.361	139.603	114.781	18.0737	6.83121	92.5269	126.006	132.503	127.228	150.069	125.667	18.6708	7.05691	258.214	371.547	370.949	391.987	324.774	343.494	47.9907	18.1388
L-NAME+AD. 200	15	110.186	151.492	157.48	163.491	177.491	152.028	22.6298	8.55327	86.4404	113.904	123.044	116.22	140.392	116	17.4515	6.59606	94.3556	126.433	134.523	131.977	152.758	128.009	19.0038	7.18278	246.414	378.117	370.731	387.497	320.59	340.67	52.5091	19.8466
	20	110.221	150.527	153.086	164.248	166.04	148.824	20.2266	7.64495	86.0977	111.465	121.472	115.607	139.792	114.887	17.3475	6.55675	94.1387	124.486	132.01	131.82	148.542	126.199	17.8626	6.75142	245.225	373.97	368.773	383.782	326.388	339.628	51.1186	19.321
	25	109.048	153.356	154.087	152.954	170.31	147.951	20.5196	7.75567	84.0632	109.611	121.68	114.391	140.27	114.003	18.2467	6.89662	92.3915	124.193	132.482	127.245	150.283	125.319	18.7815	7.09875	240.014	371.942	361.079	382.23	323.816	335.816	51.8066	19.5811

## Sheet: ELECTROCARDIOGRAMME
Colonne1	Colonne2	Colonne3	Colonne4	Colonne5	Colonne6	Colonne7	Colonne8	Colonne9
ECG Parameter	Time (ms)						Magnitude (mV)
	P-R Interval	QRS Interval	Q-T Interval	S-T Interval	S-T Segment	R-R Interval	P Wave	QRS Complex (R)
NaCl 0,9 %	44.15	20	75	35.2	4.95	149.2	0.09	0.55
	43.1	20.2	60	35.6	5.05	149.5	0.07	0.6
	42.3	24.3	50	36	5	147.2	0.11	0.55
	44.1	20	70	32.6	5.05	148.15	0.08	0.6
	43	25.5	75	35.6	4.95	147.6	0.1	0.6
Moyenne	43.33	22	66	35	5	148.33	0.09	0.58
Ecart type	0.705408	2.39917	9.69536	1.22638	0.0447214	0.890842	0.0141421	0.0244949
ESM	0.287981	0.979456	3.95811	0.500666	0.0182574	0.363685	0.0057735	0.01
LN	41.2	37	86.4	40.1	7.35	159.15	0.08	0.65
	42.25	40.2	87.4	39.5	9	160.05	0.1	0.6
	44.45	36	83.2	38.3	8.95	158.25	0.06	0.6
	41.15	38	86.1	40	9.4	160.2	0.08	0.6
	44.3	37.15	85.25	38.75	8.65	159	0.08	0.6
Moyenne	42.67	37.67	85.67	39.33	8.67	159.33	0.08	0.61
Ecart type	1.44727	1.41549	1.41336	0.702567	0.701855	0.718749	0.0126491	0.02
ESM	0.590847	0.57787	0.577004	0.286822	0.286531	0.293428	0.00516398	0.00816497
LN + Capt,	46.35	21	60.65	35.2	7	169	0.05	0.55
	44.55	21.2	62.4	42.3	5	170.35	0.15	0.5
	45.7	20	62.4	40.45	6.95	170.2	0.05	0.45
	45.25	16.1	62.15	43.4	8.05	168	0.05	0.4
	46.5	20.05	62.4	40.3	8	166.2	0.1	0.5
Moyenne	45.67	19.67	62	40.33	7	168.75	0.08	0.48
Ecart type	0.718749	1.84976	0.681909	2.8156	1.10499	1.53558	0.04	0.0509902
ESM	0.293428	0.75516	0.278388	1.14946	0.45111	0.626897	0.0163299	0.0208167
LN + AD, 100	49	35.15	65.1	41.5	7.05	172.2	0.1	0.7
	52.1	32.1	66.1	40.6	7.5	171	0.15	0.65
	48.2	32.15	69	40.55	6	170	0.1	0.75
	49.2	31.25	65.1	36.8	5.6	168	0.1	0.8
	48.15	36	61.35	42.2	7	167.15	0.15	0.75
Moyenne	49.33	33.33	65.33	40.33	6.63	169.67	0.12	0.73
Ecart type	1.44693	1.88005	2.44982	1.86805	0.711056	1.86644	0.0244949	0.0509902
ESM	0.590706	0.767529	1.00013	0.762627	0.290287	0.761971	0.01	0.0208167
LN + AD, 200	49.3	21	65.1	46	7.1	157.6	0.12	0.45
	46.6	21.01	68	45	7.05	159.35	0.1	0.45
	50.2	21	68.2	45	8.05	152.05	0.1	0.35
	50.15	21.02	61.5	50	8.85	155.7	0.08	0.5
	50.4	21	65	44	7.1	155.3	0.15	0.4
Moyenne	49.33	21.006	65.56	46	7.63	156	0.11	0.43
Ecart type	1.41619	0.008	2.44671	2.09762	0.715961	2.44806	0.0236643	0.0509902
ESM	0.578158	0.00326599	0.998866	0.856349	0.29229	0.999416	0.00966092	0.0208167

## Sheet: PARAM. BIOCHIMIQUES
	code	TRIG	CHOL-C	HDL-C	LDL-C	AA	CRR	CREATININE	CHLORURE	SODIUM	POTASSIUM	ALAT	ASAT
	30	37.2	63.24	30.25	19.58	0.320266	2.09058	10.3752	84.5962	118.38	10.7034	47.2039	102.776
	31	26.3344	67.571	36.28	39.18	0.270093	1.86249	9.22326	91.2232	120.318	11.371	40.8982	113.977
NaCl 0,9 %	32	33.23	61.98	43.38	12.12	0.154962	1.42877	1.63721	86.6623	113.169	10.6	41.9384	121.549
	33	36.4844	70.2	19.372	40.1	0.559163	3.62379	1.46512	90.9843	107.607	11.46	36.7781	102.135
	34	33.1844	63.21	22.11	30.09	0.456197	2.85889	1.17519	84.3369	118.369	10.8525	41.4178	143.005
	Moyenne	33.2866	65.2402	30.2784	28.214	0.352136	2.3729	4.77519	87.5606	115.569	10.9974	41.6473	116.688
	Ecart type	3.84415	3.12358	8.86955	10.9418	0.141643	0.778783	4.12089	3.00409	4.63561	0.351832	3.32514	15.0259
	ESM	1.56937	1.27519	3.62098	4.46696	0.0578253	0.317937	1.68235	1.22641	1.89248	0.143635	1.35748	6.13431
	35	53.3969	83.4757	13.08	50.56	0.804952	6.38194	10.807	95.3419	141.356	6.06	68.8803	125.8
	36	50.6706	74.18	10.17	34.38	0.862966	7.294	12.9279	92.9757	129.31	6.19462	52.5811	192.837
L-NAME + ED	37	52.0742	85.64	8.73	59.17	0.991662	9.80985	18.43	93.6419	174.3	6.30556	46.6724	197.207
	38	52.0106	79.9126	12.43	37.53	0.808144	6.42901	18.1163	92.1316	114.761	5.90052	41.9384	204.055
	39	47.2188	79.1262	11.32	45.97	0.844474	6.98995	17.8605	90.1012	137.056	5.8669	66.5646	178.553
	Moyenne	51.0742	80.4669	11.146	45.522	0.86244	7.38095	15.6283	92.8385	139.357	6.06552	55.3274	179.69
	Ecart type	2.11183	3.93558	1.56262	8.94278	0.0682266	1.26208	3.14831	1.72763	19.6784	0.167925	10.6927	28.209
	ESM	0.862151	1.60669	0.637937	3.65087	0.0278534	0.515242	1.28529	0.705302	8.03369	0.0685552	4.36529	11.5163
	51	28.9795	73.233	26.4407	42.4964	0.442434	2.76971	5.36124	88.64	117.822	9.01	38.83	111.289
	52	26.2625	62.9126	34.5203	22.3798	0.260663	1.82248	4.12	86.54	122.41	8.64	39.3455	64.8753
L-NAME+Capto.	53	31.3477	68.2194	29.58	32.6691	0.36291	2.30627	5.2093	88.0436	116.322	8.79	32.2187	76.1027
	54	23.6094	63.6194	18.08	37.2168	0.546391	3.51877	5.88	88.4793	110.006	8.9	40.8982	64.3265
	55	34.6984	62.2262	12.2814	45.4516	0.704727	5.06672	4.24	87.547	117.522	8.88289	48.2701	65.9763
	Moyenne	28.9795	66.0421	24.1805	36.0427	0.463425	3.09679	4.96211	87.85	116.817	8.84458	39.9125	76.5139
	Ecart type	3.86095	4.16351	7.99976	8.11927	0.152818	1.13265	0.677277	0.757027	3.98566	0.123883	5.12852	17.9136
	ESM	1.57623	1.69974	3.26589	3.31468	0.0623876	0.462402	0.276497	0.309055	1.62714	0.050575	2.09371	7.31322
	56	62.8188	72.1029	19.56	38.6891	0.566584	3.68624	6.44961	80.63	101.362	12.2978	33.7299	132.351
	57	53.2188	74.1631	18.94	45.7533	0.592808	3.91569	7.38605	81.11	101.023	11.6109	41.9384	80.153
L-NAME+AD. 100	58	21.1469	59.8359	17.12	37.9604	0.543458	3.49509	6.69767	80.6726	94.2196	10.7034	42.4601	112.628
	59	43.7188	73.5097	20.67	44.288	0.551004	3.55635	6.44961	78.5	113.488	11.6109	32.2187	80.7371
	60	23.1984	69.9029	18.08	47.6532	0.587297	3.86631	5.26512	80.5	93.0231	11.8315	41.4178	68.1923
	Moyenne	40.8203	69.9029	18.874	42.8688	0.56823	3.70394	6.44961	80.2825	100.623	11.6109	38.353	94.8124
	Ecart type	16.3929	5.24104	1.21717	3.86746	0.0193943	0.165479	0.684321	0.914579	7.27973	0.518489	4.42988	23.8671
	ESM	6.69235	2.13965	0.496908	1.57888	0.0079177	0.0675565	0.279373	0.373375	2.97194	0.211672	1.80849	9.74372
	61	42.2812	51.0155	15.8983	36.261	0.506352	3.20887	5.46512	84.8844	76.6355	15.1617	42.4601	122.956
	62	38.9395	59.1291	9.38644	41.2548	0.799301	6.29942	2.97674	89.46	69.8131	17.3753	42.9829	92.1107
L-NAME+AD. 200	63	26.4688	64.2126	11.0983	42.9206	0.762364	5.7858	2.97674	83.0962	106.299	16.0017	37.8021	84.2711
	64	49.6094	60.4175	21.6	24.4956	0.446709	2.79711	3.47287	84.57	110.615	13.2651	33.7299	130.143
	65	32.3984	62.3126	27.1017	30.1312	0.36158	2.29921	1.47287	88.0877	69.6224	14.0046	33.7299	103.42
	Moyenne	37.9395	59.4175	17.0169	35.0126	0.575261	4.07808	3.27287	86.0197	86.597	15.1617	38.141	106.58
	Ecart type	7.97895	4.53985	6.5911	6.89194	0.174433	1.63777	1.28541	2.36852	18.0782	1.45201	4.02815	17.5525
	ESM	3.25739	1.85338	2.6908	2.81362	0.0712121	0.668617	0.524764	0.966942	7.38038	0.592782	1.64448	7.16576

## Sheet: PARAM. OXYDANTIFS
					NITRITE			MALONDIALDEHYDE			CATALASE			GLUTATHION
			code	Aorta	Heart	Kidney	Aorta	Heart	Kidney	Aorta	Heart	Kidney	Aorta	Heart	Kidney
			30	47.02	55.57	23.26	142.63	171.31	69.15	43.75	23.44	24.22	2.67	2.21	3.78
			31	45.44	48.88	43.82	133.65	181.25	48.96	46.88	46.88	26.56	0.86	2.32	4.64
		NaCl 0,9 %	32	48.98	71.9	32.8	131.09	197.6	71.39	46.88	42.19	21.09	0.82	4.01	3.62
			33	47.15	58.79	33.29	135.79	183.39	63.17	45.83	37.5	23.96	1.43	2.85	4.01
			34	47.15	58.79	33.29	135.79	183.39	63.17	45.83	37.5	23.96	1.43	2.85	4.01
			Moyenne	47.148	58.786	33.292	135.79	183.388	63.168	45.834	37.502	23.958	1.442	2.848	4.012
			Ecart type	1.1216	7.48931	6.50726	3.83289	8.3956	7.81349	1.14292	7.84429	1.73577	0.668413	0.638135	0.346952
			ESM	0.457889	3.0575	2.65658	1.56477	3.42749	3.18984	0.466595	3.20242	0.708625	0.272878	0.260517	0.141643
			35	39.54	40.82	24.34	226.6	177.08	124.92	25	39.06	21.88	0.54	1.37	2.53
			36	39.15	47.11	22.28	114.42	215.22	60.98	25	25	30.47	0.65	1.68	2.47
		L-NAME + ED	37	43.08	33.93	23.56	225.96	214.9	105.05	31.25	20.31	35.16	0.34	1.18	2.3
			38	40.59	40.62	23.39	189	202.4	96.98	27.08	28.13	29.17	0.51	1.41	2.44
			39	40.59	40.62	23.39	189	202.4	96.98	27.08	28.13	29.17	0.58	1.66	2.43
			Moyenne	40.59	40.62	23.392	188.996	202.4	96.982	27.082	28.126	29.17	0.524	1.46	2.434
			Ecart type	1.36939	4.16932	0.657796	40.846	13.8687	20.6967	2.28218	6.17113	4.25944	0.103267	0.188361	0.0755248
			ESM	0.559053	1.70212	0.268544	16.6753	5.66187	8.4494	0.931695	2.51935	1.73891	0.0421584	0.0768982	0.0308329
			51	69.44	61.67	24.54	147.12	200.48	80.53	65.63	45.31	56.25	1.69	2.81	4.57
			52	56.06	46.52	21	143.91	149.84	99.6	71.88	56.25	71.09	2.89	2.22	3.03
		L-NAME+Capto.	53	74.95	50.85	24.15	206.73	177.4	69.15	87.5	40.63	37.5	1.97	2.04	3.34
			54	66.82	53.02	23.23	165.92	175.91	83.09	75	47.4	54.95	2.19	2.35	3.65
			55	66.82	53.02	23.23	165.92	175.91	83.09	75	47.4	54.95	2.19	2.35	3.65
			Moyenne	66.818	53.016	23.23	165.92	175.908	83.092	75.002	47.398	54.948	2.186	2.354	3.648
			Ecart type	6.14392	4.93521	1.22763	22.3756	16.0346	9.73095	7.12434	5.06998	10.6461	0.397069	0.254763	0.515147
			ESM	2.50825	2.01479	0.501179	9.1348	6.54612	3.97265	2.9085	2.06981	4.34623	0.162103	0.104006	0.210308
			56	52.92	54.2	31.13	156.73	183.81	69.47	68.75	39.06	57.03	0.77	2.13	3.72
			57	62.36	59.7	28.87	82.37	193.75	89.18	43.75	45.31	53.91	0.97	2.59	2.49
		L-NAME+AD. 100	58	43.47	57.15	35.07	143.91	9.81	64.98	43.75	48.44	52.34	3.28	2.41	2.64
			59	52.92	57.02	31.69	127.67	129.12	74.55	52.08	44.27	54.43	1.67	2.38	2.95
			60	52.92	57.02	31.69	127.67	129.12	74.55	52.08	44.27	54.43	1.67	2.38	2.95
			Moyenne	52.918	57.018	31.69	127.67	129.122	74.546	52.082	44.27	54.428	1.672	2.378	2.95
			Ecart type	5.97354	1.74079	1.98446	25.1408	65.4262	8.1416	9.12871	3.02042	1.50987	0.882279	0.146615	0.424405
			ESM	2.43869	0.710673	0.810152	10.2637	26.7101	3.32379	3.72678	1.23308	0.6164	0.360189	0.0598554	0.173263
			61	65.11	40.62	24.74	206.09	196.96	53.77	28.13	32.81	46.88	1.11	2.4	3.9
			62	65.11	43.18	31.33	236.86	129.97	72.52	40.63	65.63	57.81	0.86	1.97	3.56
		L-NAME+AD. 200	63	61.57	60.1	25.52	178.53	144.71	56.49	34.38	43.75	49.22	0.76	1.84	3.41
			64	63.93	47.97	27.2	273.82	157.21	60.92	34.38	47.4	51.3	0.91	2.07	3.62
			65	63.93	47.97	27.2	273.82	157.21	60.92	34.38	47.4	51.3	0.91	2.07	3.62
			Moyenne	63.93	47.968	27.198	233.824	157.212	60.924	34.38	47.398	51.302	0.91	2.07	3.622
			Ecart type	1.29263	6.69483	2.27732	37.5105	22.2636	6.40792	3.95285	10.569	3.63986	0.114018	0.185365	0.158795
			ESM	0.527712	2.73315	0.929711	15.3136	9.08906	2.61602	1.61374	4.31479	1.48597	0.0465475	0.0756747	0.064828

## Sheet: POIDS RELATIF DES ORGANES
						code	Kidney	Heart	Left Vent.	IHV
						30	0.537549	0.288538	0.0988142	0.342466
						31	0.743363	0.316651	0.133093	0.420314
					NaCl 0,9 %	32	0.674877	0.305419	0.167488	0.548387
						33	0.526158	0.282511	0.133034	0.470899
						34	0.4858	0.390135	0.133034	0.340996
						Moyenne	0.593549	0.316651	0.133093	0.424613
						Ecart type	0.0983318	0.038683	0.0217165	0.0790201
						ESM	0.0401438	0.0157923	0.00886573	0.0322598
						35	0.652941	0.478632	0.230769	0.482143
						36	0.790698	0.31068	0.194175	0.625
					L-NAME + ED	37	0.683962	0.404359	0.169811	0.487379
						38	0.940104	0.380208	0.182292	0.479452
						39	0.908854	0.447917	0.208333	0.465116
						Moyenne	0.795312	0.404359	0.197076	0.507818
						Ecart type	0.115366	0.0579187	0.0211297	0.0590536
						ESM	0.0470978	0.0236452	0.00862616	0.0241086
						51	0.530973	0.318584	0.154867	0.486111
						52	0.62212	0.267281	0.138249	0.517241
					L-NAME+Capto.	53	0.52381	0.314286	0.154762	0.492424
						54	0.626263	0.318182	0.164141	0.515873
						55	0.70202	0.343434	0.164141	0.477941
						Moyenne	0.601037	0.312353	0.155232	0.497918
						Ecart type	0.0665604	0.0247954	0.00946083	0.0159024
						ESM	0.0271732	0.0101227	0.00386237	0.00649213
						56	0.503846	0.288462	0.138462	0.48
						57	0.547009	0.294872	0.153846	0.521739
					L-NAME+AD. 100	58	0.552632	0.285088	0.140351	0.492308
						59	0.594828	0.301724	0.146552	0.485714
						60	0.579592	0.285714	0.138776	0.485714
						Moyenne	0.555581	0.291172	0.143597	0.493095
						Ecart type	0.0312266	0.0063117	0.00589801	0.0148427
						ESM	0.0127482	0.00257674	0.00240785	0.00605952
						61	0.603774	0.334906	0.150943	0.450704
						62	0.628743	0.343467	0.179641	0.523022
					L-NAME+AD. 200	63	0.666667	0.343434	0.151515	0.441176
						64	0.590909	0.338384	0.141414	0.41791
						65	0.581633	0.357143	0.153061	0.428571
						Moyenne	0.614345	0.343467	0.155315	0.452277
						Ecart type	0.0305808	0.00756525	0.0128344	0.0370772
						ESM	0.0124846	0.0030885	0.00523961	0.0151367
